# Supplementary material for: Counterion and solvent effects on the size of magnetite nanocrystals obtained by oxidative precipitation
Source: Royal Society of Chemistry journal article supplement (doi:10.1039/c6tc03567a), 2016-01-01
Supplement: c6tc03567a1.pdf [file c6tc03567a1.pdf]

## Counterion and solvent effects on the size of magnetite nanocrystals obtained by oxidative precipitation

Y. Luengo, M. P. Morales, L. Gutiérrez and S. Veintemillas-Verdaguer

### SUPPLEMENTARY INFORMATION

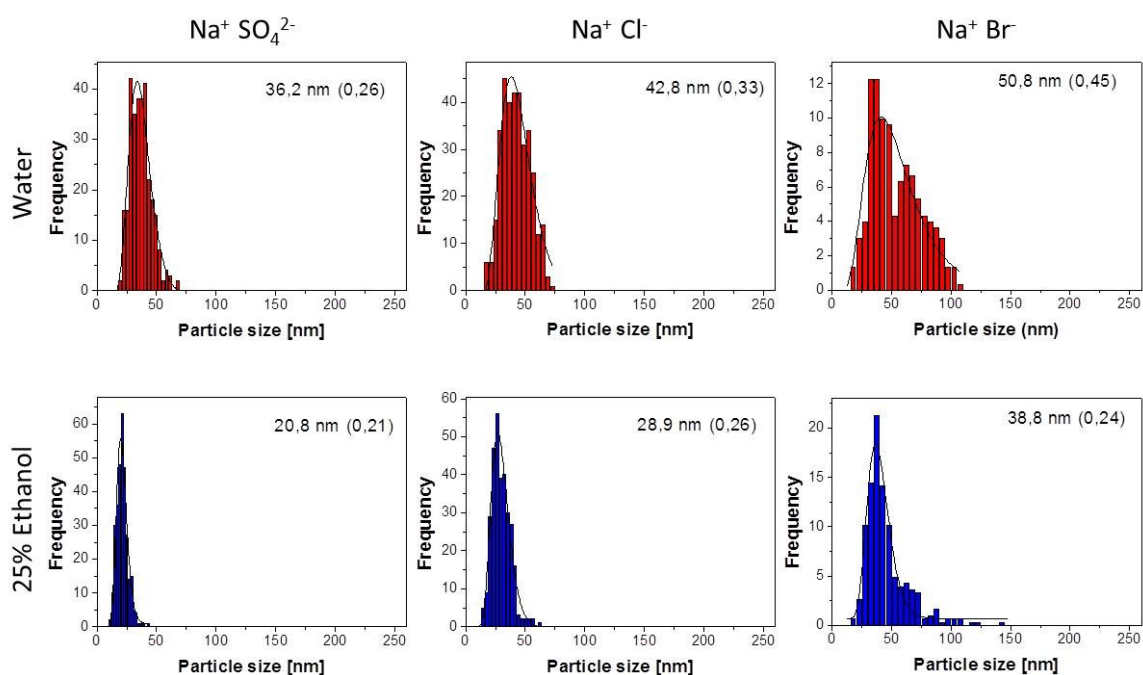

Figure 1S: TEM micrographs and particle size distributions of the sodium bearing samples obtained using different counterions in water and ethanol 25%.

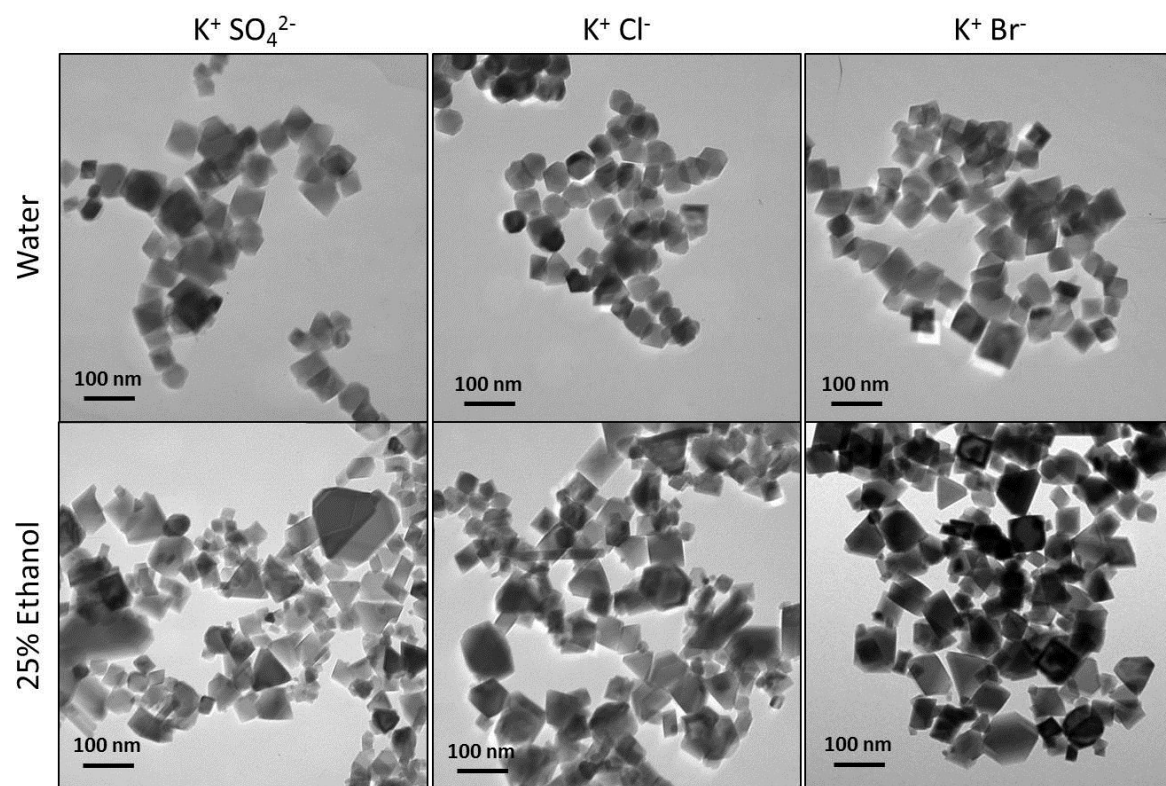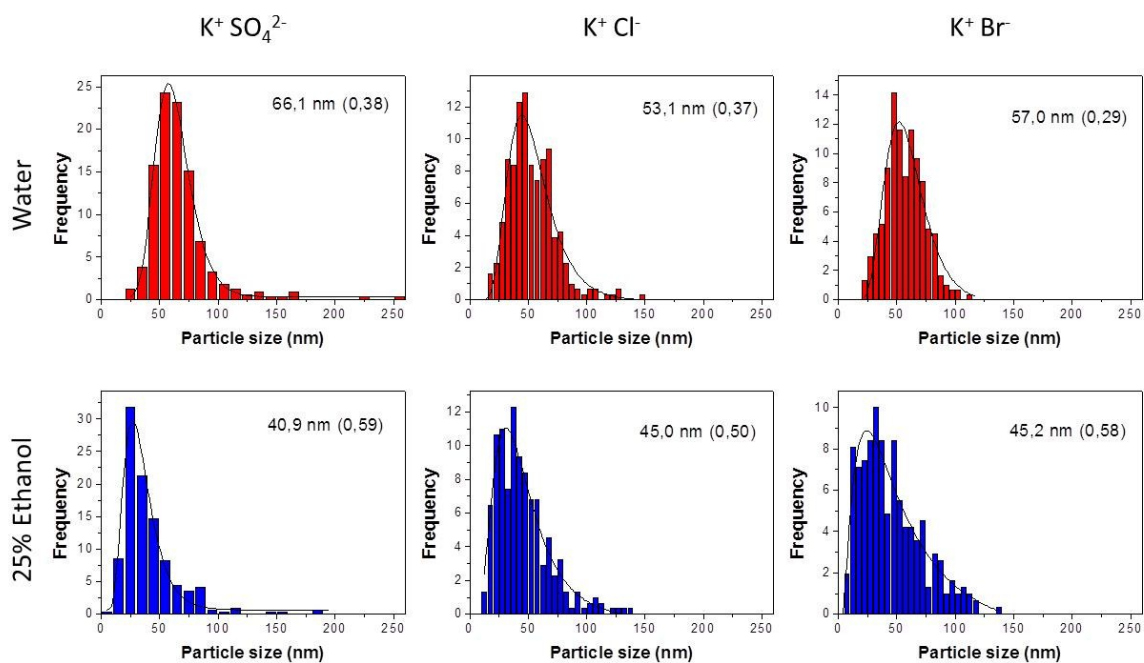

Figure 2s: TEM micrographs and particle size distributions of the potassium bearing samples obtained using different counterions in water and ethanol 25%.

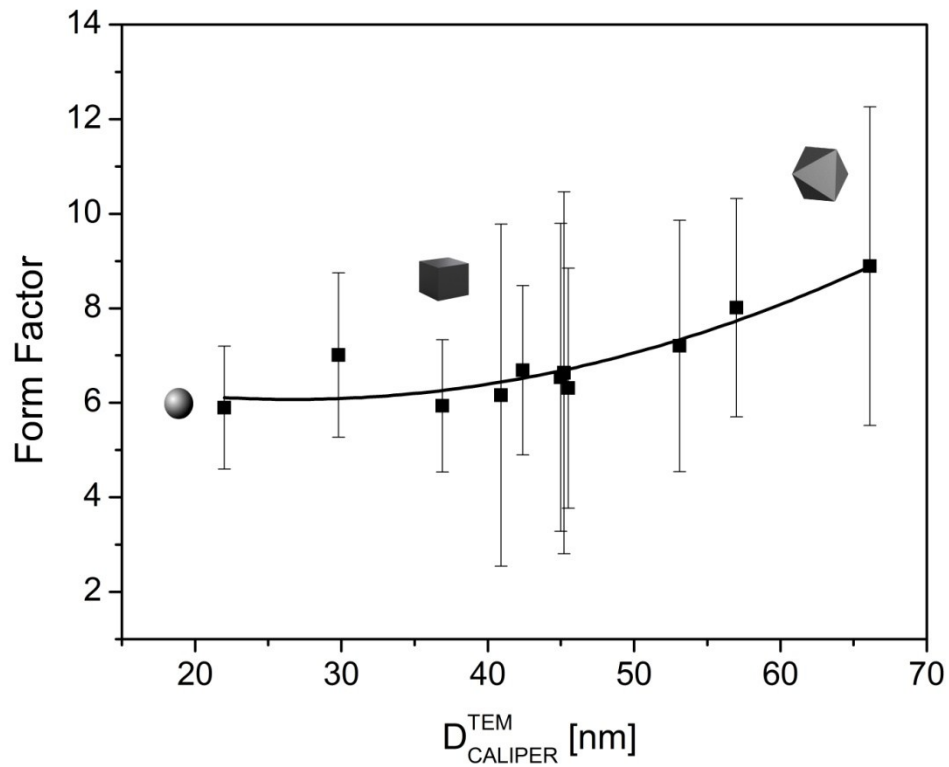

Figure 3S: Dependence of the form factor and size

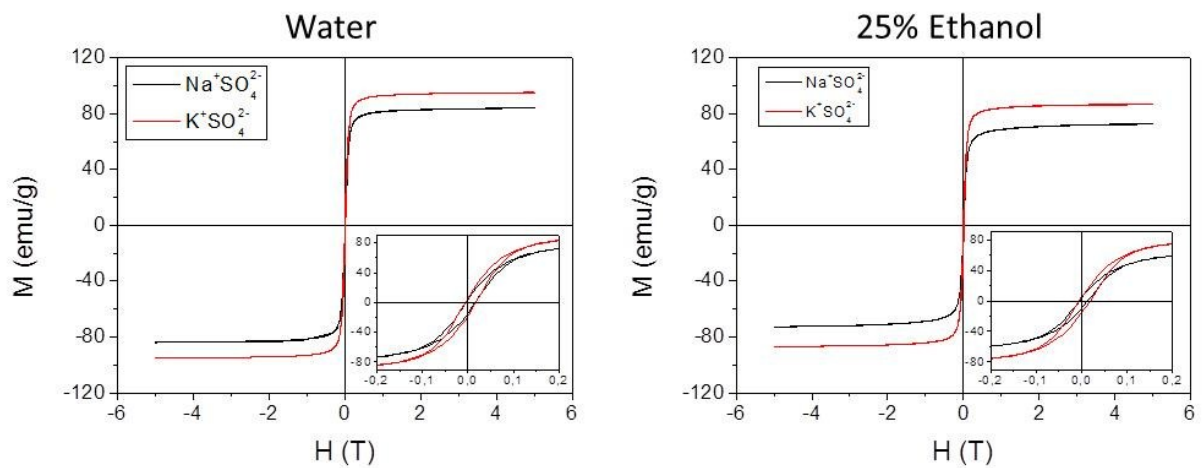

Figure 4S: Magnetization curves measured at room temperature for samples prepared from different counterions in water and 25% ethanol.

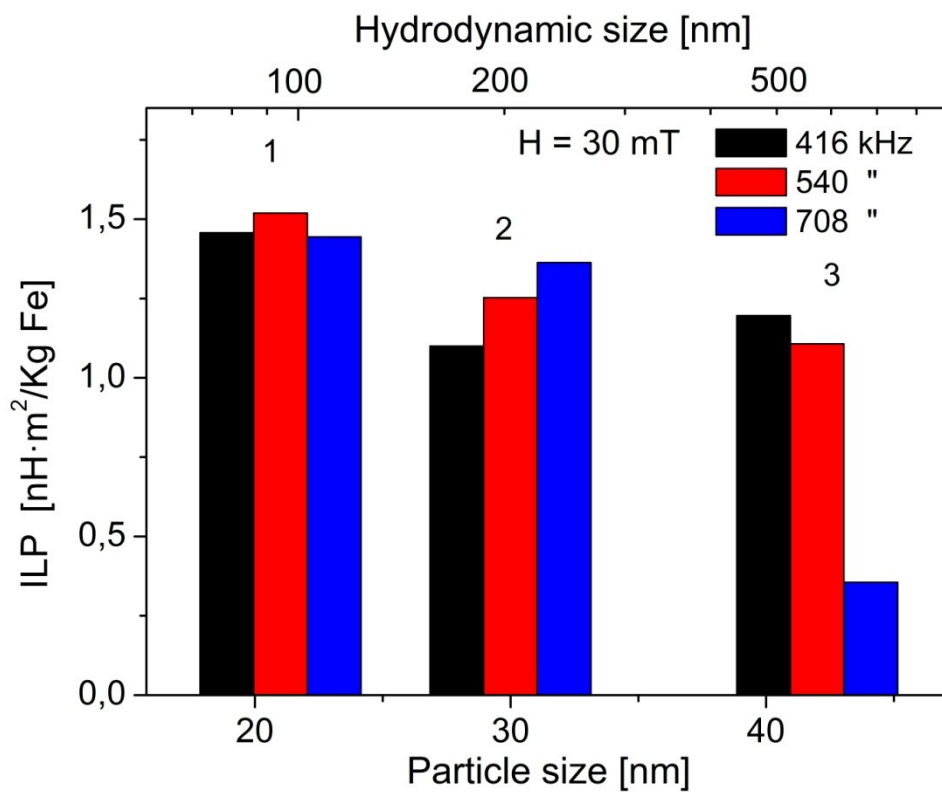

Figure 5S: ILP values of aqueous dispersions of selected samples prepared using Na<sup>+</sup> SO<sub>4</sub><sup>2-</sup> 25% ethanol(1) Na<sup>+</sup> Cl<sup>-</sup> 25% ethanol (2) and Na<sup>+</sup> Cl<sup>-</sup> in water(3)

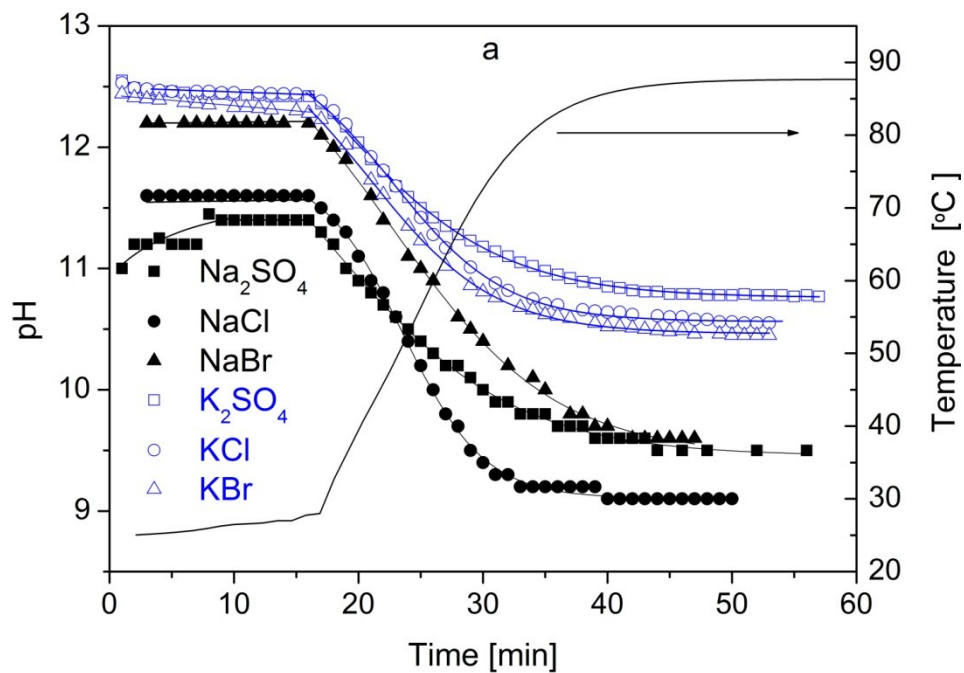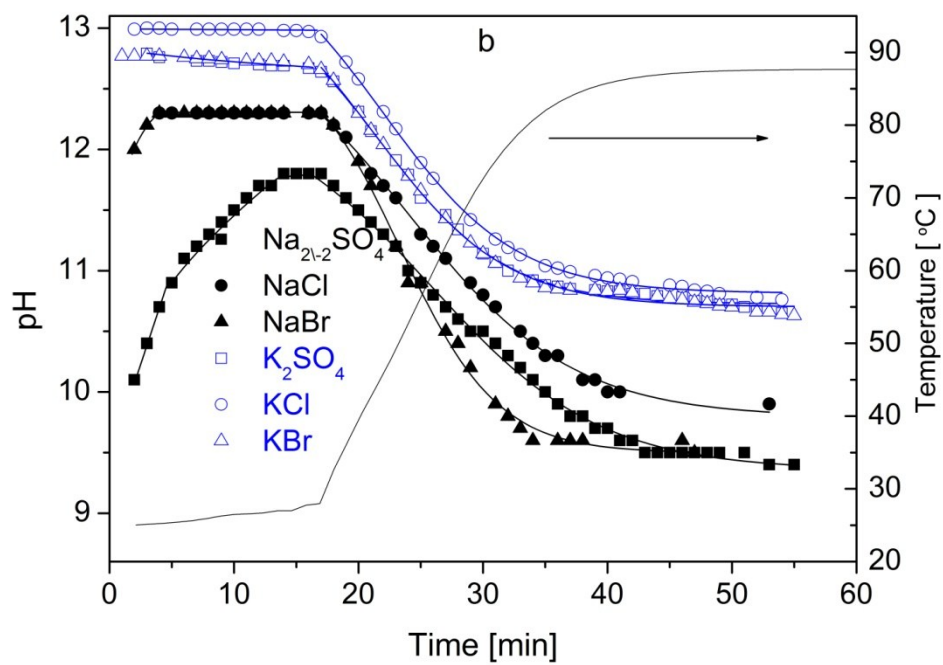

Figure 6S: Evolution of the pH with time for the different counter ions present in water (a) and in ethanol 25% (b).
